# Supplementary material for: Integrative Modelling of the Influence of MAPK Network on Cancer Cell Fate Decision
Source: PLOS journal article supplement (doi:10.1371/journal.pcbi.1003286), 2013-10-24
Supplement: S5 (10.1371/journal.pcbi.1003286.s005) [file journal.pcbi.1003286.s005]

| Authors                 | Formalism     | Dimension | Description                                                                                                                                     |
|-------------------------|---------------|-----------|-------------------------------------------------------------------------------------------------------------------------------------------------|
| Huang and Ferrel [26]   | ODE           | 18        | Ultrasensitivity of MAPK cascades depending on their particular structure: double phosphorylation and double de-phosphorylation mechanisms.     |
| Kholodenko [27]         | ODE           | 8         | Sustained oscillations of MAPK phosphorylation level, induced by negative feedback loop and cascade ultrasensitivity.                           |
| Levchenko et al. [28]   | ODE           | 27        | Effects of scaffold proteins on MAPK activation.                                                                                                |
| Brightman and Fell [33] | ODE           | 29        | Transient versus sustained ERK activation following growth signals.                                                                             |
| Schoeberl et al. [34]   | ODE           | 94        | Dynamics of EGF-dependent ERK activation.                                                                                                       |
| Hatakeyama et al. [35]  | ODE           | 33        | Interplay between PI3K-AKT and RAF-ERK pathways in EGFR signalling network.                                                                     |
| Markevich et al. [29]   | ODE           | 13, 15    | Bistable behaviour of MAPK cascades due to multistep phosphorylation/de-phosphorylation cycles.                                                 |
| Hornberg et al. [36]    | ODE           | 103       | Identification of reactions controlling amplitude, duration and integrated output of EGF-dependent ERK signalling network.                      |
| Samaga et al. [43]      | Logical model | 104       | Topological properties and qualitative behaviour of the EGFR signalling network.                                                                |
| Orton et al. [38]       | ODE           | 31        | Effects of cancerous alterations on EGFR/ERK pathway.                                                                                           |
| Sasagawa et al. [37]    | ODE           | 22        | Transient versus sustained ERK activation following growth signals.                                                                             |
| Legewie et al. [30]     | ODE           | 12, 21    | Bistability of ERK activation due to MEK-ERK positive feedback circuit.                                                                         |
| Smolen et al. [31]      | ODE           | 26        | Mechanisms contributing to the bistable behaviour of MAPK cascades.                                                                             |
| Chen et al. [39]        | ODE           | 478       | Model of immediate-early signalling involving ErbB receptors, along with MAPK and PI3K pathways, trained against time course experimental data. |
| Sturm et al. [32]       | ODE           | 14, 9     | Negative feedback amplifier properties of ERK cascade.                                                                                          |
| Bagheri et al. [40]     | ODE           | 4         | Predictions of MEK inhibition-based treatment effects on tumour cell proliferation.                                                             |
| Finch et al. [42]       | ODE           | 6         | Phosphatase-mediated cross-talk between p38 and ERK cascades.                                                                                   |
| Handorf and Klipp [41]  | Logical model | 107       | Boolean model of cross-talk between WNT and ERK pathways, semi-automatically derived from a public reaction database.                           |
| Poltz and Naumann [45]  | Logical model | 96        | DNA damage response network in human epithelial tumours; identification of target molecules for DNA damaging therapies.                         |

**Table S1.** Selected MAPK modelling studies. ODE = ordinary differential equations.
